# Supplementary material for: Physical property investigation of contemporary glass ionomer and resin-modified glass ionomer restorative materials
Source: Springer Nature journal article supplement (doi:10.1007/s00784-018-2554-3), 2018-07-11
Supplement: MOESM12 [file 15945214]

RMGI Flexural Toughness Correlation with Flexural Strength and Modulus (Spearman’s)

| Material | Flexure Strength (r2; p value) | Flexural Modulus  (r2; p value) |
| --- | --- | --- |
| Fuji II LC | 0.839; p < 0.001 | 0.028; p = 0.931 |
| Ketac Nano | 0.848; p < 0.001 | 0.323; p = 0.054 |
| Riva LC | 0.175; p = 0..586 | 0.044; p = 0.891 |
| Riva LC HV | 0.713; p = 0.009 | 0.028; p = 0.931 |

n = 12
